# Supplementary material for: High uniformity and monodispersity of sodium rare-earth fluoride nanocrystals: controllable synthesis, shape evolution and optical properties
Source: Royal Society of Chemistry journal article supplement (doi:10.1039/c0ce00325e), 2010-11-12
Supplement: c0ce00325e.pdf [file c0ce00325e.pdf]

# **High Uniformity and Monodispersity of Sodium Rare-Earth Fluoride Nanocrystals: Controllable synthesis, Shape evolution, and Optical Properties**

Songjun Zeng, Guozhong Ren, Changfu Xu, Qibin Yang\*

Institute of Modern Physics, Xiangtan University, Xiangtan, 411105, China and Key Laboratory of Low-dimensional Materials and Application Technology, Ministry of Education, Xiangtan, 411105, China;

\* Corresponding Author: E-mail: [yqb@xtu.edu.cn](mailto:yqb@xtu.edu.cn)

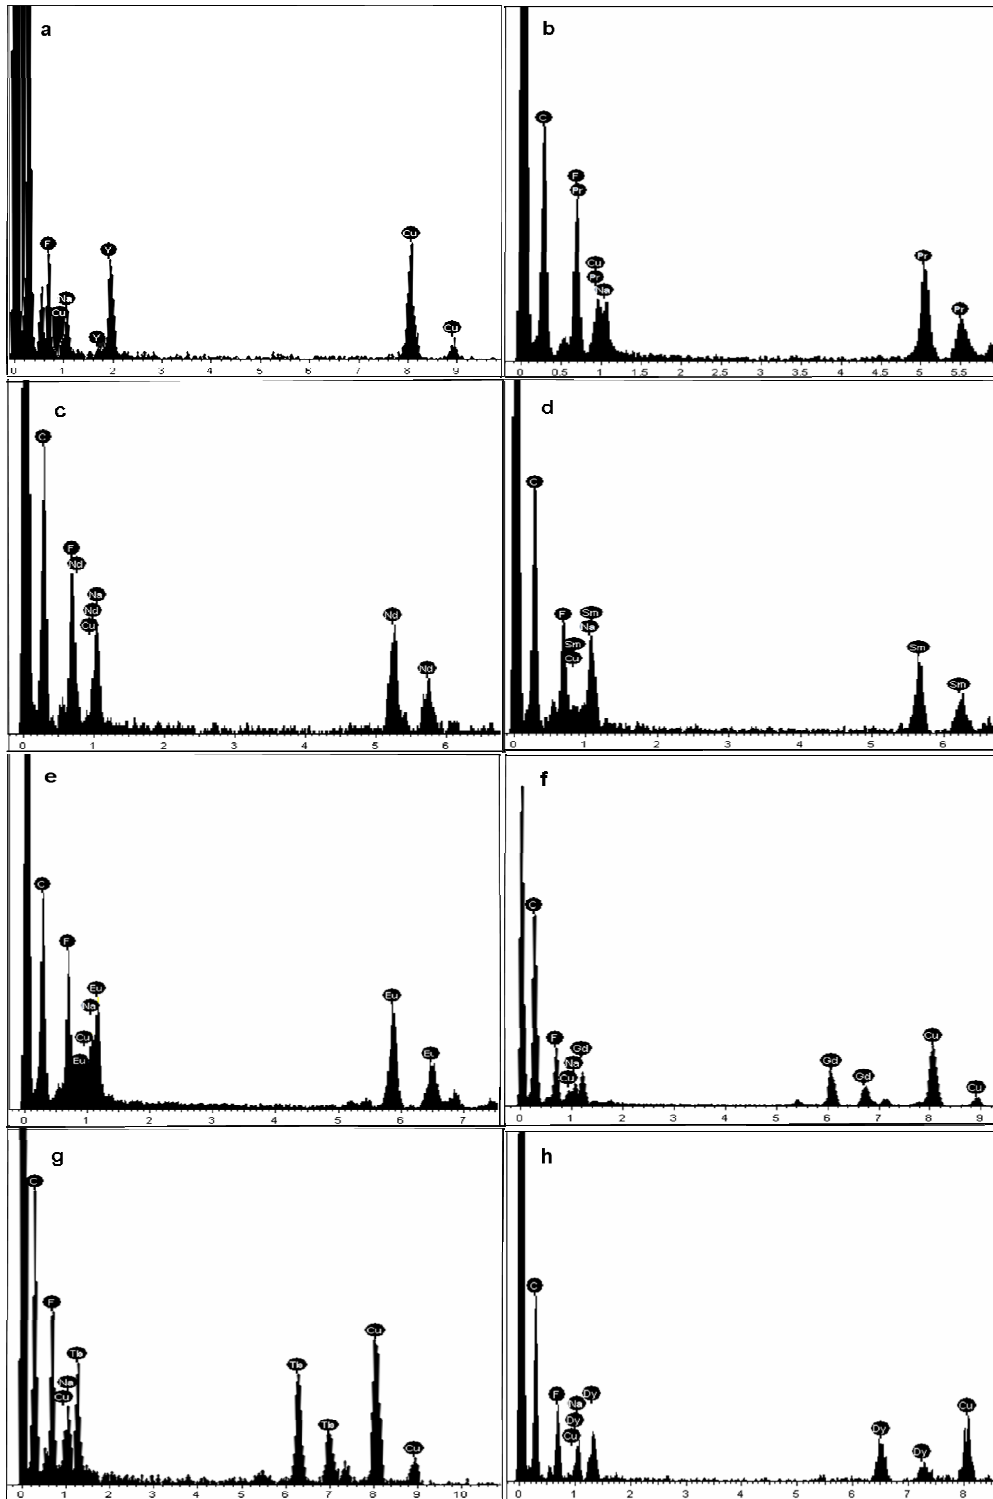

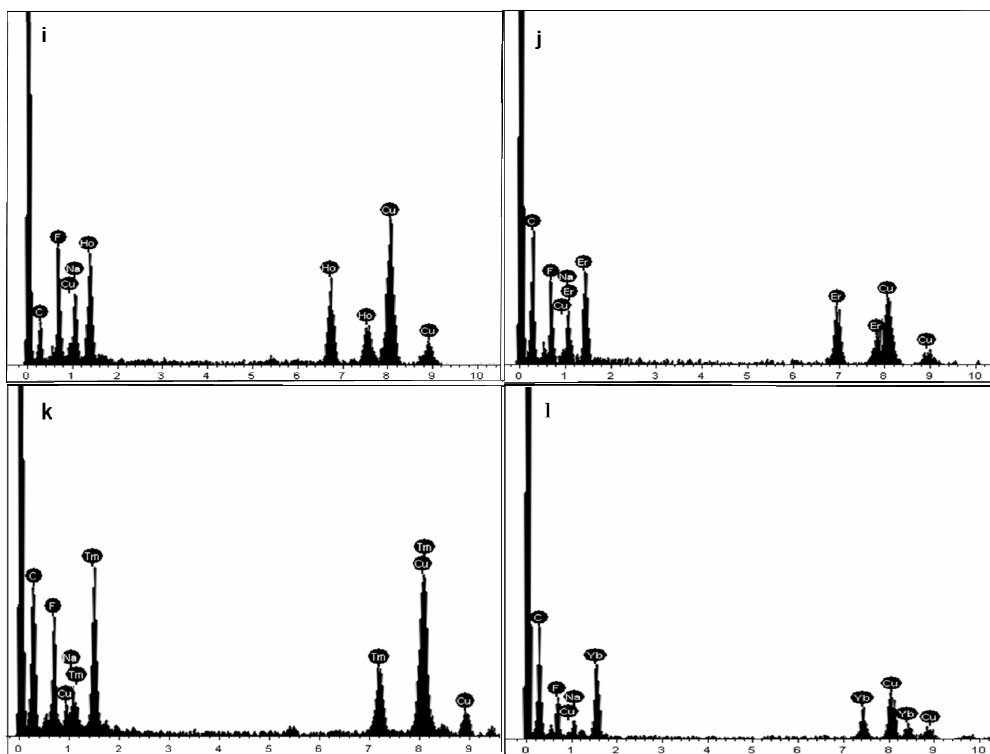

**Figure S1.** Energy dispersive X-ray spectroscopy analysis (EDS) of  $\text{NaReF}_4$  nanocrystals: a)  $\text{NaYF}_4$ , b)  $\text{NaPrF}_4$ , c)  $\text{NaNdF}_4$ , d)  $\text{NaSmF}_4$ , e)  $\text{NaEuF}_4$ , f)  $\text{NaGdF}_4$ , g)  $\text{NaTbF}_4$ , h)  $\text{NaDyF}_4$ , i)  $\text{NaHoF}_4$ , j)  $\text{NaErF}_4$ , k)  $\text{NaTmF}_4$  and l)  $\text{NaYbF}_4$ .

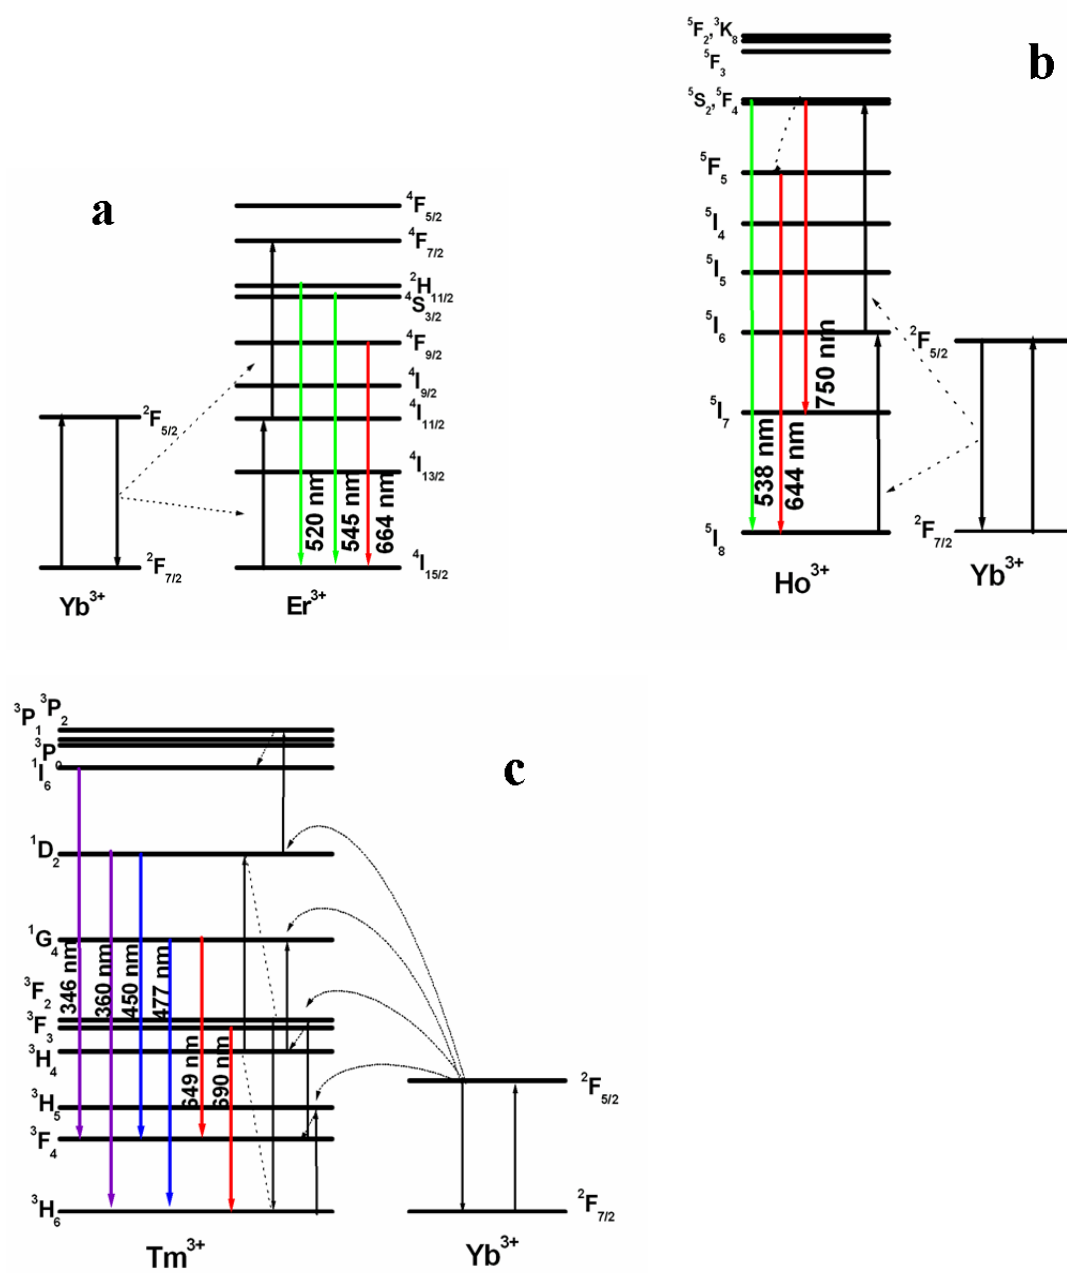

**Figure S2.** Simplified energy level diagrams of upconversion excitation for the Yb<sup>3+</sup>/Er<sup>3+</sup> (a),

Yb<sup>3+</sup>/Ho<sup>3+</sup> (b) and Yb<sup>3+</sup>/Tm<sup>3+</sup> (c) systems.
